# Supplementary material for: NH 3 -promoted hydrolysis of NO 2 induces explosive growth in HONO
Source: Copernicus journal article supplement (doi:10.5194/acp-2018-996), 2018-11-30
Supplement: Supplementary file 1 [file acp-2018-996-supplement.pdf]

---

1        **NH<sub>3</sub>-promoted hydrolysis of NO<sub>2</sub> induces explosive growth in HONO**

2        **W. Y. Xu<sup>1</sup>, Y. Kuang<sup>2,\*</sup>, C. S. Zhao<sup>3</sup>, J. C. Tao<sup>2</sup>, G. Zhao<sup>3</sup>, Y. X. Bian<sup>4</sup>, Y. L. Yu<sup>3</sup>,**  
3        **C. Y. Shen<sup>3</sup>, L. L. Liang<sup>1</sup>, G. Zhang<sup>1</sup>**

4        <sup>1</sup> State Key Laboratory of Severe Weather, Key Laboratory for Atmospheric  
5        Chemistry, Institute of Atmospheric Composition, Chinese Academy of  
6        Meteorological Sciences, Beijing, 100081, China.

7        <sup>2</sup> Institute for Environmental and Climate Research, Jinan University, Guangzhou,  
8        China.

9        <sup>3</sup> Department of Atmospheric and Oceanic Sciences, School of Physics, Peking  
10        University, Beijing, China

11        <sup>4</sup> State Key Laboratory of Severe Weather, Chinese Academy of Meteorological  
12        Sciences, Beijing, 100081, China

13        Corresponding author: Ye Kuang ([kuangye@jnu.edu.cn](mailto:kuangye@jnu.edu.cn))

14

15

16

17

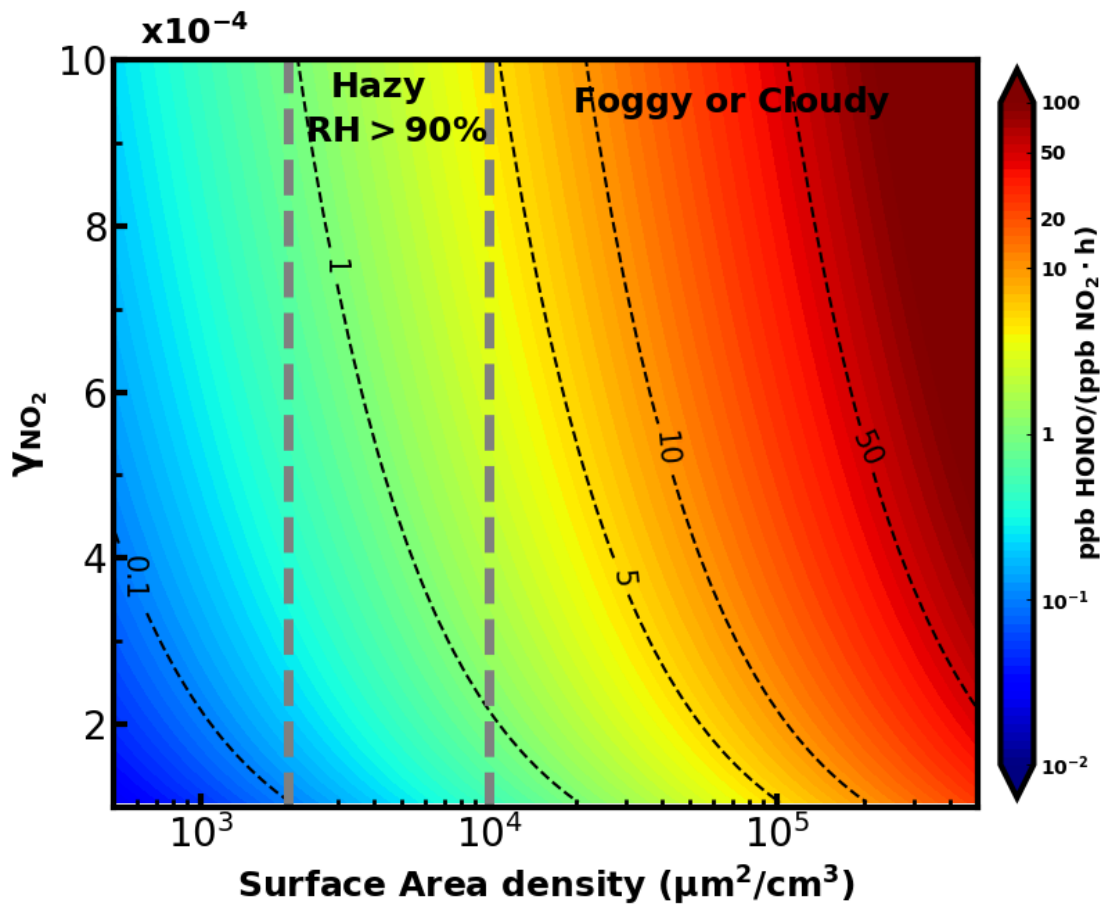

18

19 **Figure S1.** The production rate of HONO under different conditions and with different values of reactive  
 20  $\text{NO}_2$  uptake coefficients ( $\gamma_{\text{NO}_2}$ ), the  $\gamma_{\text{NO}_2}$  range is from Li et al. (2018). The surface area density range of  
 21 fog is calculated based on the fog droplet size distribution measured on the North China Plain (Shen et  
 22 al.).

23

24

a) 2016-11-04–2016-11-05

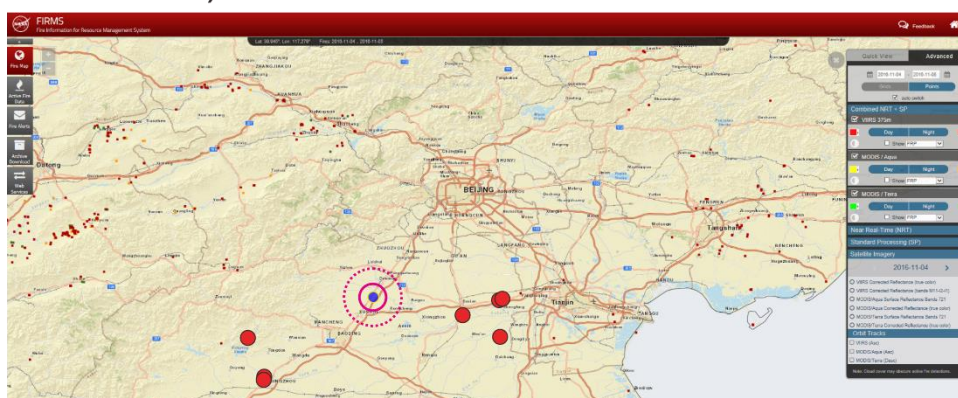

b) 2016-11-11

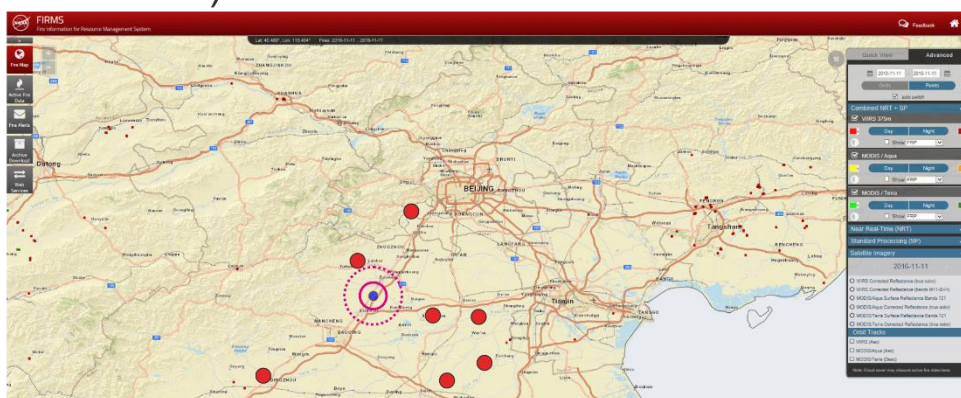

c) 2016-11-14

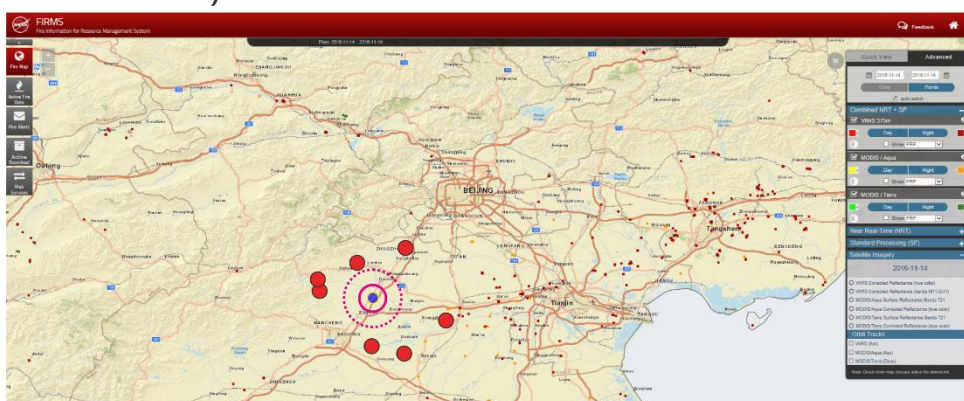

25

26 **Figure S2.** Fire spots maps (large red dots: fire spots closest to the station, bright and  
 27 red dots: VIIRS, yellow and orange dots: MODIS Aqua, bright and dark green dots:  
 28 MODIS Terra) produced by NASA's Web Fire Mapper (<https://firms.modaps.eosdis.nasa.gov/firemap/>), respectively for the 4<sup>th</sup>-5<sup>th</sup>, 11<sup>th</sup> and 14<sup>th</sup> Nov. 2016. The blue dot  
 29 shows the location of the Gucheng site, while the pink solid and dashed line circles  
 30 respectively cover areas within 10 and 20 km distance.  
 31

32

33 Indirect oxidation of S(IV) by HONO:

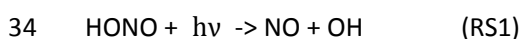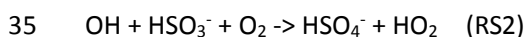

---

36  $\text{OH} + \text{RH} + \text{O}_2 \rightarrow \text{RO}_x + \text{HO}_2$  (RS3)

37  $\text{HO}_2 + \text{NO} \rightarrow \text{NO}_2 + \text{OH}$  (RS4)

38  $\text{HO}_2 + \text{HO}_2 \rightarrow \text{H}_2\text{O}_2 + \text{O}_2$  (RS5)

39  $\text{HSO}_3^- + \text{H}_2\text{O}_2 \rightarrow \text{HSO}_4^- + \text{H}_2\text{O}$  (RS6)

40

41 Li, L., Hoffmann, M. R., and Colussi, A. J.: Role of Nitrogen Dioxide in the  
42 Production of Sulfate during Chinese Haze-Aerosol Episodes, *Environmental science*  
43 *& technology*, 10.1021/acs.est.7b05222, 2018.

44 Shen, C., Zhao, C., Ma, N., Tao, J., Zhao, G., Yingli, Y., and Kuang, Y.: Method to  
45 Estimate Water Vapor Supersaturation in the Ambient Activation Process using  
46 Aerosol and Droplet Measurement Data, *Journal of Geophysical Research:*  
47 *Atmospheres*, 0, doi:10.1029/2018JD028315.

48
