# Supplementary material for: NH 3 -promoted hydrolysis of NO 2 induces explosive growth in HONO
Source: Copernicus journal article supplement (doi:10.5194/acp-2018-996), 2018-11-30
Supplement: Supplementary file [file acp-2018-996-AC2-supplement.zip]

1  
2  
3  
4  
5  
6  
7  
8  
9  
10  
11  
12  
13  
14  
15  
16  
17  
18  
19  
20  
21  
22

---

**NH<sub>3</sub>-promoted hydrolysis of NO<sub>2</sub> induces explosive growth in HONO**

**Wanyun Xu<sup>1</sup>, Ye Kuang<sup>2,\*</sup>, Chunsheng Zhao<sup>3</sup>, Jiangchuan Tao<sup>2</sup>, Gang Zhao<sup>3</sup>,  
Yuxuan Bian<sup>4</sup>, Wen Yang<sup>5</sup>, Yingli Yu<sup>3</sup>, Chuanyang Shen<sup>3</sup>, Linlin Liang<sup>1</sup>, Gen  
Zhang<sup>1</sup>, Weili Lin<sup>6</sup>, Xiaobin Xu<sup>1</sup>**

<sup>1</sup> State Key Laboratory of Severe Weather, Key Laboratory for Atmospheric Chemistry,  
Institute of Atmospheric Composition, Chinese Academy of Meteorological Sciences,  
Beijing, 100081, China.

<sup>2</sup> Institute for Environmental and Climate Research, Jinan University, Guangzhou,  
China.

<sup>3</sup> Department of Atmospheric and Oceanic Sciences, School of Physics, Peking  
University, Beijing, China

<sup>4</sup> State Key Laboratory of Severe Weather, Chinese Academy of Meteorological  
Sciences, Beijing, 100081, China

<sup>5</sup> State Key Laboratory of Environmental Criteria and Risk Assessment, Chinese  
Research Academy of Environmental Sciences, Beijing, 100081, China

<sup>6</sup> College of Life and Environmental Sciences, Minzu University of China, Beijing,  
100081, China

Corresponding author: Ye Kuang (kuangye@jnu.edu.cn)

23

Table S1. AOD assumptions for the TUV model calculations

| RH (%) | AOD |
|--------|-----|
| 40-55  | 0.6 |
| 55-70  | 0.8 |
| 70-80  | 1   |
| 80-90  | 1.5 |
| 90-97  | 2   |
| 97-100 | 2.5 |

24

25 The above assumptions were made based on the change in dry state scattering  
 26 coefficient ( $\sigma_{sp}$ ),  $f(RH)$  and RH between 11:30 to 13:30 on the 14. Nov. and the  
 27 observed MODIS AOD at 13:30, we made AOD assumptions varying with RH.

28 The MODIS AOD,  $\sigma_{sp}$  and RH at 13:30 on the 14. Nov. was 0.6, 1200  $Mm^{-1}$  and 43%,  
 29 respectively. The  $\sigma_{sp}$  and RH at 11:30 was 800  $Mm^{-1}$  and 85%. Hence, the AOD at 11:30  
 30 was estimated to be 1.44 ( $0.6 \times 1200 / 800$ ).

31

Table S2. The trace gas concentrations, liquid water content, mean diameter and temperature used to calculate the heterogeneous sulfate production

| Date                  | Time<br>(LT) | SO <sub>2</sub><br>(ppb) | H <sub>2</sub> O <sub>2</sub><br>(ppb) | NO <sub>2</sub><br>(ppb) | O <sub>3</sub><br>(ppb) | LWC<br>(g m <sup>-3</sup> ) | D <sub>p</sub><br>(μm) | T<br>(K) |
|-----------------------|--------------|--------------------------|----------------------------------------|--------------------------|-------------------------|-----------------------------|------------------------|----------|
| 4 <sup>th</sup> Nov   | 9:00         | 0.18                     | 0.26                                   | 45.3                     | 1.53                    | 0.3                         | 7.00                   | 277.8    |
|                       | 10:00        | 0.17                     | 0.29                                   | 48.8                     | 1.56                    | 0.3                         | 7.00                   | 278.4    |
|                       | 11:00        | 0.28                     | 0.34                                   | 49.9                     | 1.78                    | 0.3                         | 7.00                   | 278.7    |
| 5 <sup>th</sup> Nov.  | 10:00        | 0.16                     | 0.19                                   | 44.6                     | 2.90                    | 0.3                         | 7.00                   | 278.8    |
|                       | 11:00        | 0.39                     | 0.21                                   | 44.0                     | 3.39                    | 0.3                         | 7.00                   | 279.6    |
|                       | 12:00        | 1.19                     | 0.30                                   | 45.1                     | 5.72                    | 0.3                         | 7.00                   | 281.3    |
| 11 <sup>th</sup> Nov. | 7:00         | 0.40                     | 0.52                                   | 30.7                     | 1.41                    | 3.4 e <sup>-4</sup>         | 1.22                   | 271.2    |
|                       | 8:00         | 0.44                     | 0.71                                   | 33.0                     | 1.53                    | 2.1e <sup>-4</sup>          | 0.73                   | 272.3    |
|                       | 9:00         | 1.61                     | 0.89                                   | 32.7                     | 1.83                    | 7.8e <sup>-5</sup>          | 0.65                   | 274.8    |
| 14 <sup>th</sup> Nov. | 11:00        | 1.27                     | 0.32                                   | 41.6                     | 1.52                    | 0.01                        | 0.90                   | 278.1    |

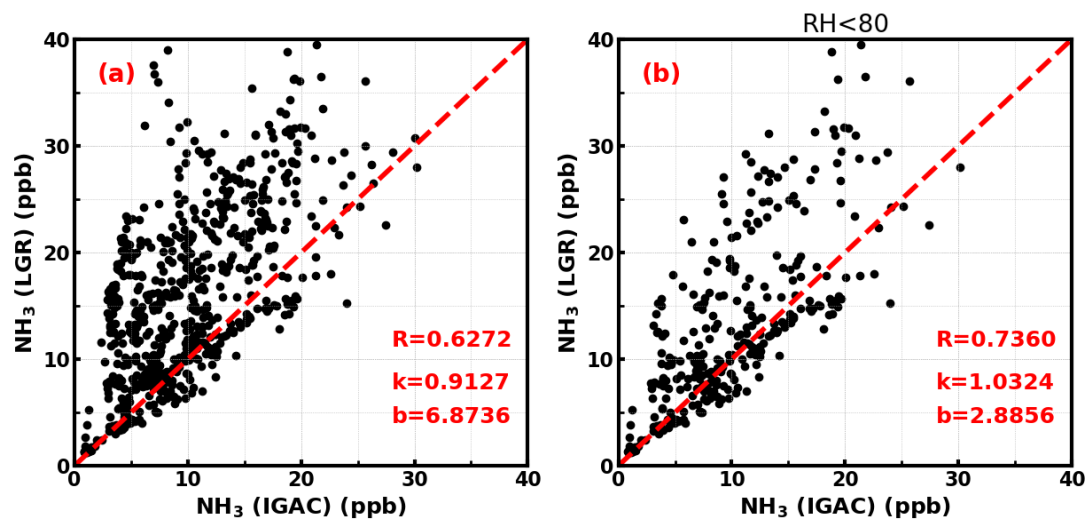

**Figure S1** Comparison between  $\text{NH}_{3,\text{IGAC}}$  and  $\text{NH}_{3,\text{LGR}}$  using a) all measurement data and b) data associated with  $\text{RH} < 80$ .

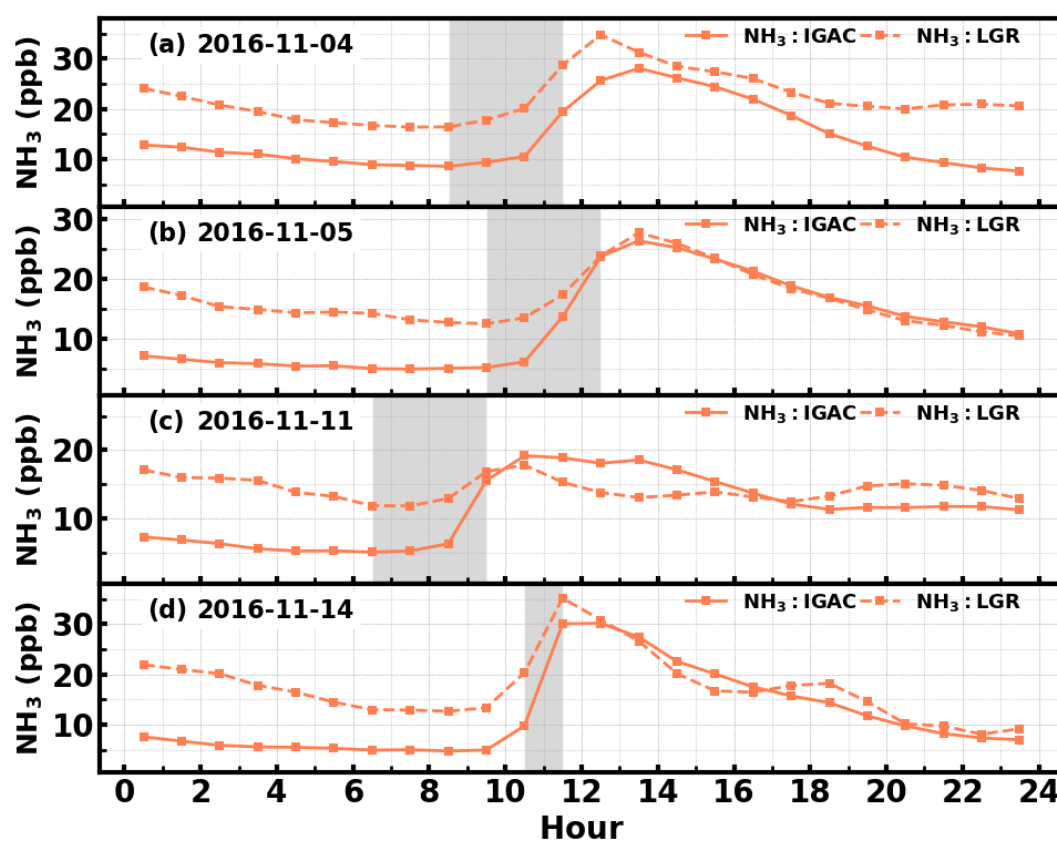

**Figure S2** Time series of  $\text{NH}_3$ ,<sub>IGAC</sub> (solid) and  $\text{NH}_3$ ,<sub>LGR</sub> (dashed) during a) 4<sup>th</sup> Nov., b) 5<sup>th</sup> Nov., c) 11<sup>th</sup> Nov. 2016 and d) 14<sup>th</sup> Nov. 2016. Gray shaded areas represents periods of rapid increase of HONO.

a) 2016-11-04–2016-11-05

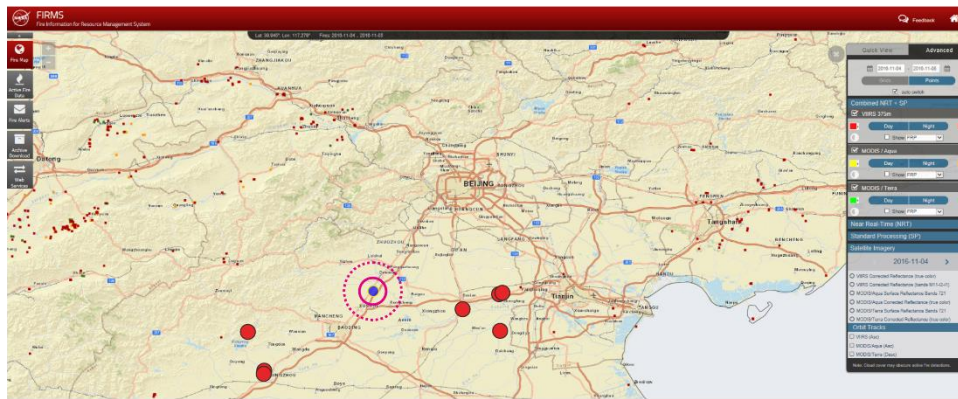

b) 2016-11-11

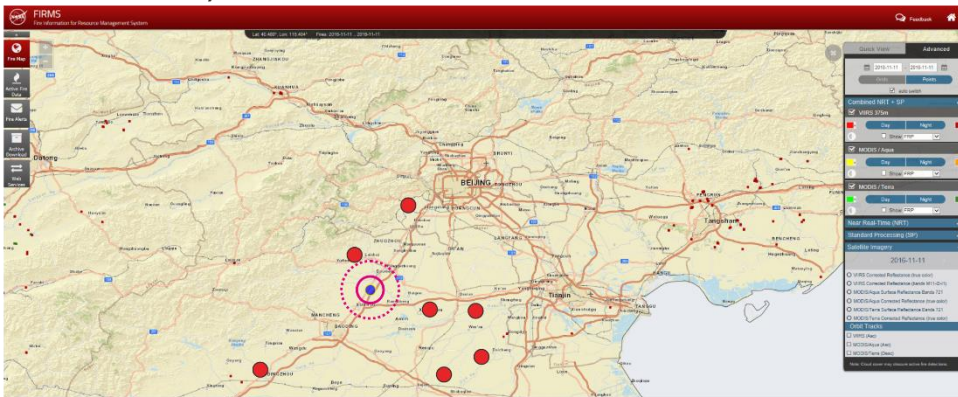

c) 2016-11-14

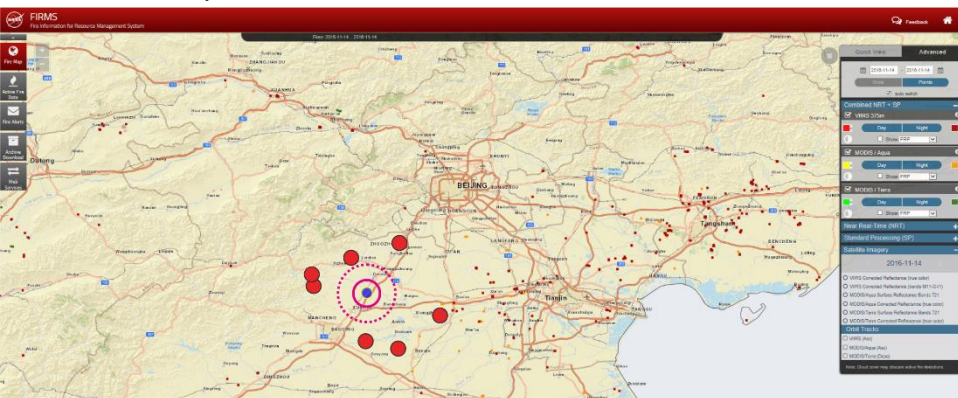

**Figure S3.** Fire spots maps (large red dots: fire spots closest to the station, bright and red dots: VIIRS, yellow and orange dots: MODIS Aqua, bright and dark green dots: MODIS Terra) produced by NASA's Web Fire Mapper (<https://firms.modaps.eosdis.nasa.gov/firemap/>), respectively for the 4<sup>th</sup>-5<sup>th</sup>, 11<sup>th</sup> and 14<sup>th</sup> Nov. 2016. The blue dot shows the location of the Gucheng site, while the pink solid and dashed line circles respectively cover areas within 10 and 20 km distance.

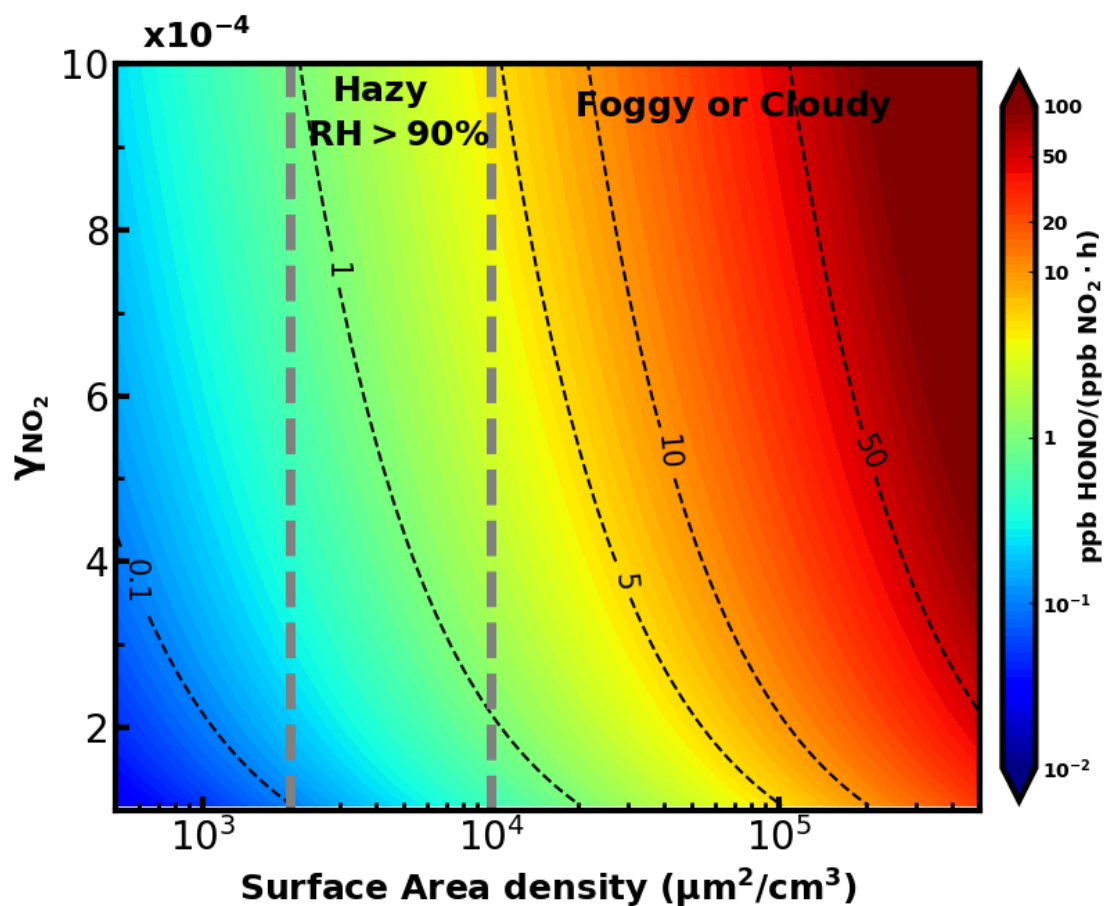

55

56 **Figure S4.** The production rate of HONO under different conditions and with different  
 57 values of reactive NO<sub>2</sub> uptake coefficients ( $\gamma_{\text{NO}_2}$ ), the  $\gamma_{\text{NO}_2}$  range is from Li et al.  
 58 (2018). The surface area density range of fog is calculated based on the fog droplet size  
 59 distribution measured on the North China Plain (Shen et al., 2018).

60

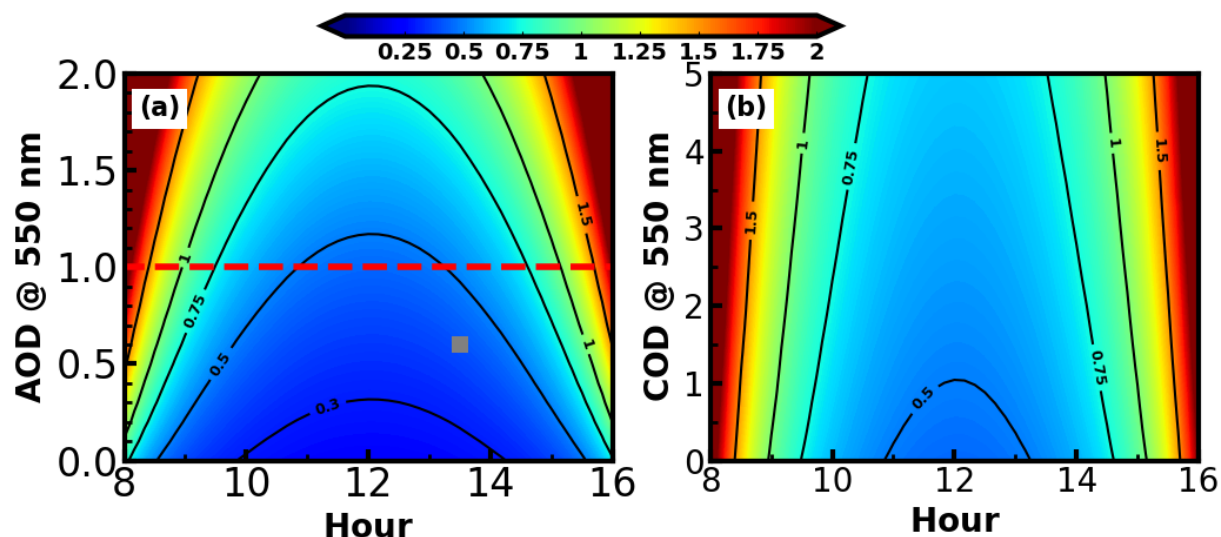

**Figure S5. (a)** Diurnal variations of lifetime of HONO under different aerosol optical depth (AOD) conditions. Gray solid marker represents the AOD position from MODIS Aqua on the 14<sup>th</sup> Nov. 2016 (about 13:30); **(b)** Diurnal variations of lifetime of HONO under different cloud optical depth (COD) conditions, with an AOD of 1.



---

Indirect oxidation of S(IV) by HONO:

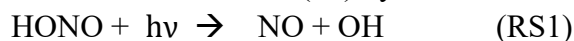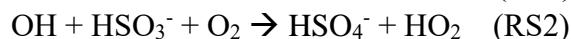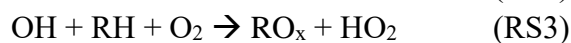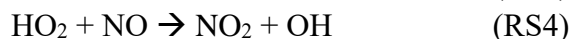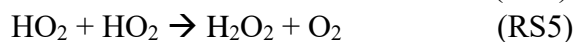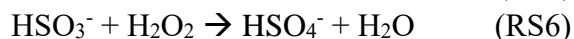

## Reference

Li, L., Hoffmann, M. R., and Colussi, A. J.: Role of Nitrogen Dioxide in the Production of Sulfate during Chinese Haze-Aerosol Episodes, *Environmental science & technology*, 10.1021/acs.est.7b05222, 2018.

Shen, C., Zhao, C., Ma, N., Tao, J., Zhao, G., Yu, Y., and Kuang, Y.: Method to Estimate Water Vapor Supersaturation in the Ambient Activation Process Using Aerosol and Droplet Measurement Data, *Journal of Geophysical Research: Atmospheres*, 123, 10606-10619, doi:10.1029/2018JD028315, 2018.
